# Supplementary material
Source: ML conference proceedings conference paper supplement (https://openreview.net/forum?id=t851DsVVtA)
Supplement: supplementary_material [file attachment]

## 1 Appendix

### 2 A The Loss Function Leads to the Linear Combined Estimator

3 In Section 3, we have introduced a linear combined estimator

$$\tilde{P}_{X_1 X_2 Y} \triangleq (1 - \alpha) \cdot \hat{P}_{X_1 X_2 Y} + \alpha \cdot \hat{P}_{X_1 X_2 Y}^{(M)}. \quad (1)$$

4 We say that the estimator (1) is obtained from a widely-used loss function. First note that we can  
5 define the loss of different dependency structures as

$$L_0 \triangleq \sum_{x_1, x_2, y} \hat{P}_{X_1 X_2 Y}(x_1, x_2, y) \log \frac{1}{Q_{X_1 X_2 Y}(x_1, x_2, y)}, \quad (2)$$

$$L_1 \triangleq \sum_{x_1, x_2, y} \hat{P}_{X_1 X_2 Y}^{(M)}(x_1, x_2, y) \log \frac{1}{Q_{X_1 X_2 Y}(x_1, x_2, y)}, \quad (3)$$

6 where  $Q_{X_1 X_2 Y}$  represents the distribution estimation,  $\hat{P}_{X_1 X_2 Y}$  and  $\hat{P}_{X_1 X_2 Y}^{(M)}$  are defined in Section 3.  
7 As a result, minimizing the linear combination of  $L_0$  and  $L_1$  can give us the optimal estimator:

$$\begin{aligned} & \arg \min_{Q_{X_1 X_2 Y} \in \mathcal{P}} (1 - \alpha)L_0 + \alpha L_1 \\ &= \arg \min_{Q_{X_1 X_2 Y} \in \mathcal{P}} \sum_{x_1, x_2, y} \left( (1 - \alpha)\hat{P}_{X_1 X_2 Y}(x_1, x_2, y) + \alpha\hat{P}_{X_1 X_2 Y}^{(M)}(x_1, x_2, y) \right) \log \frac{1}{Q_{X_1 X_2 Y}(x_1, x_2, y)} \\ &= \arg \min_{Q_{X_1 X_2 Y} \in \mathcal{P}} D_{\text{KL}} \left( (1 - \alpha)\hat{P}_{X_1 X_2 Y} + \alpha\hat{P}_{X_1 X_2 Y}^{(M)} \parallel Q_{X_1 X_2 Y} \right) \\ &= (1 - \alpha)\hat{P}_{X_1 X_2 Y} + \alpha\hat{P}_{X_1 X_2 Y}^{(M)}, \end{aligned} \quad (4)$$

8 where  $D_{\text{KL}}(\cdot \parallel \cdot)$  is the K-L divergence and the second equation is obtained from the fact that the  
9 empirical distribution  $(1 - \alpha)\hat{P}_{X_1 X_2 Y} + \alpha\hat{P}_{X_1 X_2 Y}^{(M)}$  is determined by training samples and does not  
10 change with  $Q_{X_1 X_2 Y}$ .

### 11 B Detailed Statement and Proof of Theorem 3

12 For the following sections, we abuse our notations by removing all the subscripts for simplicity. We  
13 first give the detailed version of Theorem 3.

14 The testing loss of the two modality case can be expressed as

$$\begin{aligned} \tilde{\mathcal{L}}_{\text{test}}(\alpha) &= \left( \frac{1}{n}C + \frac{1}{n}V + \chi^2(P_{X_1 X_2 Y}, P_{X_1 X_2 Y}^{(M)}) \right) \cdot \alpha^2 \\ &\quad - \frac{2}{n}C \cdot \alpha + \frac{1}{n}(|\mathcal{X}_1||\mathcal{X}_2||\mathcal{Y}| - 1), \end{aligned} \quad (5)$$

15 and the optimal coefficient  $\alpha^*$  to minimize the testing loss (5) can be given as

$$\alpha^* = \frac{\frac{1}{n}C}{\chi^2(P_{X_1 X_2 Y}, P_{X_1 X_2 Y}^{(M)}) + \frac{1}{n}C + \frac{1}{n}V}, \quad (6)$$

16 where

$$C \triangleq [|\mathcal{Y}| \cdot (|\mathcal{X}_1||\mathcal{X}_2| - |\mathcal{X}_1| - |\mathcal{X}_2|) + 1] + \frac{1}{n} \left[ \sum_y \frac{|\mathcal{X}_1||\mathcal{X}_2|}{P_Y(y)} - |\mathcal{Y}| \cdot (1 + |\mathcal{X}_1| + |\mathcal{X}_2|) + 2 \right] \quad (7)$$

$$\begin{aligned} V \triangleq & -\frac{6n^2 - 11n + 6}{n^2} \chi^2(P_{X_1 X_2 Y}, P_{X_1 X_2 Y}^{(M)}) \\ & + \frac{2(n-1)(n-2)}{n^2} \left[ \sum_{x_2, y} \chi^2(P_{X_1|X_2 Y}, P_{X_1|Y}) + \sum_{x_1, y} \chi^2(P_{X_2|X_1 Y}, P_{X_2|Y}) \right] \\ & + \frac{(n-1)}{n^2} \sum_y \frac{1}{P(y)} \sum_{x_1, x_2} \frac{P(x_1|y)P(x_2|y) - P(x_1, x_2|y)}{P(x_1, x_2|y)} \\ & + \sum_y \frac{1}{P(y)} \left[ \frac{2(n-1)}{n^2} (|\mathcal{X}_1| + |\mathcal{X}_2| + 1) - \frac{(2n+1)}{n^2} |\mathcal{X}_1||\mathcal{X}_2| \right] + \frac{|\mathcal{X}_1||\mathcal{X}_2|}{n^2} \sum_y \frac{1}{(P(y))^2} \\ & + \frac{n^2 - 3n + 4}{n^2} |\mathcal{Y}| (|\mathcal{X}_1| + |\mathcal{X}_2| + 1) - \frac{1}{n} |\mathcal{Y}| - \frac{(n-2)(n-3)}{n^2}. \end{aligned} \quad (8)$$

### 17 B.1 Proof of Theorem 3

18 To compute the testing loss, we first introduce the following lemma.

19 **Lemma 1.** Suppose that random variables  $X_1, X_2$ , and  $Y$  follow a joint distribution  $P_{X_1 X_2 Y}$ .  
 20 With  $n$  samples, we have the empirical distribution  $\hat{P}_{X_1 X_2 Y}(x_1, x_2, y)$ , and the Markov estimation  
 21  $\hat{P}_{X_1 X_2 Y}^{(M)}(x_1, x_2, y) \triangleq \hat{P}_{X_1|Y}(x_1|y) \hat{P}_{X_2|Y}(x_2|y) \hat{P}_Y(y)$ . Along with the assumption that the label  
 22 distribution has been learned well, i.e.  $\hat{P}(y) = P(y)$ , we have

$$\mathbb{E} [\hat{P}^{(M)}(x_1, x_2, y)] = P^{(M)}(x_1, x_2, y) + \frac{1}{n} (P(x_1, x_2|y) - P^{(M)}(x_1, x_2, y)), \quad (9)$$

$$\mathbb{E} [\hat{P}^2(x_1, x_2, y)] = \frac{n-1}{n} P^2(x_1, x_2, y) + \frac{1}{n} P(x_1, x_2, y), \quad (10)$$

$$\begin{aligned} & \mathbb{E} [\hat{P}(x_1, x_2, y) \hat{P}^{(M)}(x_1, x_2, y)] \\ &= \frac{(n-1)(n-2)}{n^2} P(x_1, x_2, y) P^{(M)}(x_1, x_2, y) \\ &+ \frac{n-1}{n^2} P(x_1, x_2|y) (P(x_1, x_2, y) + P(x_1, y) + P(x_2, y)) + \frac{1}{n^2} P(x_1, x_2|y), \end{aligned} \quad (11)$$

$$\begin{aligned} & \mathbb{E} [(\hat{P}^{(M)}(x_1, x_2, y))^2] \\ &= \frac{(n-1)(n-2)(n-3)}{n^3} (P^{(M)}(x_1, x_2, y))^2 \\ &+ \frac{2(n-1)(n-2)}{n^3} P(x_1|y) P(x_2|y) (P(x_1, x_2, y) + P(x_1, y) + P(x_2, y)) \\ &+ \frac{(n-1)}{n^3} [P(x_1|y) P(x_2|y) + 2P(x_1, x_2|y) (P(x_1, x_2|y) + P(x_1|y) + P(x_2|y))] \\ &+ \frac{1}{n^3} \frac{1}{P(y)} P(x_1, x_2|y). \end{aligned} \quad (12)$$

23 *Proof.* For (9), we have

$$\begin{aligned} \mathbb{E} [\hat{P}^{(M)}(x_1, x_2, y)] &= \frac{1}{P(y)} \mathbb{E} [\hat{P}(x_1, y) \hat{P}(x_2, y)] \\ &= \frac{1}{P(y)} \left[ \frac{n-1}{n} P(x_1, y) P(x_2, y) + \frac{1}{n} P(x_1, x_2, y) \right] \\ &= P^{(M)}(x_1, x_2, y) + \frac{1}{n} (P(x_1, x_2|y) - P^{(M)}(x_1, x_2, y)), \end{aligned} \quad (13)$$

where to obtain (13), we have used a fact that for random variables  $Z_1$  and  $Z_2$ , with joint distribution  $P_{Z_1 Z_2}$ , along with their empirical distribution  $\hat{P}_{Z_1 Z_2}$  after  $n$  samples pairs  $(z_1^{(i)}, z_2^{(i)})$ ,  $i = 1, \dots, n$ , we have

$$\begin{aligned}\mathbb{E} [\hat{P}(Z_1)\hat{P}(Z_2)] &= \mathbb{E} \left[ \frac{1}{n^2} \mathbb{1}\{z_1^{(i)} = Z_1\} \cdot \mathbb{1}\{z_2^{(i)} = Z_2\} \right] \\ &= \frac{1}{n^2} \left( n(n-1)P(z_1)P(z_2) + nP(z_1, z_2) \right) \\ &= \frac{n-1}{n} P(z_1)P(z_2) + \frac{1}{n} P(z_1, z_2)\end{aligned}$$

Expressions (10)- (12) can be obtained similarly.  $\square$

Then, the testing loss (5) can be expressed as

$$\begin{aligned}\tilde{\mathcal{L}}_{\text{test}}(\alpha) &= \mathbb{E} \left[ \chi^2(P_{X_1 X_2 Y}, (1-\alpha) \cdot \hat{P}_{X_1 X_2 Y} + \alpha \cdot \hat{P}_{X_1 X_2 Y}^{(M)}) \right] \\ &= \sum_{x_1, x_2, y} \frac{1}{P(x_1, x_2, y)} \mathbb{E} \left[ \left( (1-\alpha) \cdot \hat{P}(x_1, x_2, y) + \alpha \cdot \hat{P}^{(M)}(x_1, x_2, y) - P(x_1, x_2, y) \right)^2 \right] \\ &= \sum_{x_1, x_2, y} \frac{1}{P(x_1, x_2, y)} \mathbb{E} \left[ \left[ \left( \hat{P}(x_1, x_2, y) - P(x_1, x_2, y) \right) \right. \right. \\ &\quad \left. \left. + \alpha \left( \hat{P}^{(M)}(x_1, x_2, y) - \hat{P}(x_1, x_2, y) \right) \right]^2 \right] \\ &= \alpha^2 \sum_{x_1, x_2, y} \frac{1}{P(x_1, x_2, y)} \mathbb{E} \left[ \left( \hat{P}^{(M)}(x_1, x_2, y) - \hat{P}(x_1, x_2, y) \right)^2 \right] \tag{14}\end{aligned}$$

$$\begin{aligned}&+ 2\alpha \sum_{x_1, x_2, y} \frac{1}{P(x_1, x_2, y)} \mathbb{E} \left[ \left( \hat{P}^{(M)}(x_1, x_2, y) - \hat{P}(x_1, x_2, y) \right) \right. \\ &\quad \left. \cdot \left( \hat{P}(x_1, x_2, y) - P(x_1, x_2, y) \right) \right] \tag{15}\end{aligned}$$

$$+ \sum_{x_1, x_2, y} \frac{1}{P(x_1, x_2, y)} \mathbb{E} \left[ \left( \hat{P}(x_1, x_2, y) - P(x_1, x_2, y) \right)^2 \right]. \tag{16}$$

To obtain the testing loss  $\tilde{\mathcal{L}}_{\text{test}}$ , we need to derive the expressions after the coefficient  $\alpha$  in terms (14)-(16).

As for (16), we have that

$$\begin{aligned}&\sum_{x_1, x_2, y} \frac{1}{P(x_1, x_2, y)} \mathbb{E} \left[ \left( \hat{P}(x_1, x_2, y) - P(x_1, x_2, y) \right)^2 \right] \\ &= \sum_{x_1, x_2, y} \frac{1}{P(x_1, x_2, y)} \left[ \frac{n-1}{n} P^2(x_1, x_2, y) + \frac{1}{n} P(x_1, x_2, y) - 2P^2(x_1, x_2, y) + P^2(x_1, x_2, y) \right] \tag{17}\end{aligned}$$

$$\begin{aligned}&= \frac{1}{n} \sum_{x_1, x_2, y} (1 - P(x_1, x_2, y)) \\ &= \frac{1}{n} (|\mathcal{X}_1||\mathcal{X}_2||\mathcal{Y}| - 1), \tag{18}\end{aligned}$$

where to obtain (17), we have used (10).

33 As for (15), we have that

$$\begin{aligned}
& \sum_{x_1, x_2, y} \frac{1}{P(x_1, x_2, y)} \mathbb{E} \left[ \left( \hat{P}^{(M)}(x_1, x_2, y) - \hat{P}(x_1, x_2, y) \right) \left( \hat{P}(x_1, x_2, y) - P(x_1, x_2, y) \right) \right] \\
&= \sum_{x_1, x_2, y} \left[ \frac{1}{P(x_1, x_2, y)} \mathbb{E} \left[ \hat{P}^{(M)}(x_1, x_2, y) \hat{P}(x_1, x_2, y) \right] - \mathbb{E} \left[ \hat{P}^{(M)}(x_1, x_2, y) \right] \right. \\
&\quad \left. - \frac{1}{n} (1 - P(x_1, x_2, y)) \right] \\
&= \sum_{x_1, x_2, y} \frac{1}{P(x_1, x_2, y)} \left[ \frac{(n-1)(n-2)}{n^2} P(x_1, x_2, y) P^{(M)}(x_1, x_2, y) + \frac{1}{n^2} P(x_1, x_2|y) \right. \\
&\quad \left. + \frac{n-1}{n^2} P(x_1, x_2|y) (P(x_1, x_2, y) + P(x_1, y) + P(x_2, y)) \right] \\
&\quad - \sum_{x_1, x_2, y} \left[ P^{(M)}(x_1, x_2, y) + \frac{1}{n} \left( P_{X_1 X_2|Y}(x_1, x_2|y) - P^{(M)}(x_1, x_2, y) \right) \right] \\
&\quad - \frac{1}{n} \sum_{x_1, x_2, y} (1 - P(x_1, x_2, y)) \tag{19} \\
&= \frac{(n-1)(n-2)}{n^2} + \frac{n-1}{n^2} |\mathcal{Y}| (1 + |\mathcal{X}_1| + |\mathcal{X}_2|) + \frac{|\mathcal{X}_1||\mathcal{X}_2|}{n^2} \sum_y \frac{1}{P_Y(y)} - 1 \\
&\quad - \frac{1}{n} (|\mathcal{Y}| - 1) - \frac{1}{n} (|\mathcal{X}_1||\mathcal{X}_2||\mathcal{Y}| - 1) \\
&= -\frac{1}{n} [|\mathcal{Y}| \cdot (|\mathcal{X}_1||\mathcal{X}_2| - |\mathcal{X}_1| - |\mathcal{X}_2|) + 1] + \frac{1}{n^2} \left[ \sum_y \frac{|\mathcal{X}_1||\mathcal{X}_2|}{P_Y(y)} - |\mathcal{Y}| \cdot (1 + |\mathcal{X}_1| + |\mathcal{X}_2|) + 2 \right], \tag{20}
\end{aligned}$$

34 where to obtain (19), we have used (9) and (11).

35 As for (14), we have that

$$\begin{aligned}
& \sum_{x_1, x_2, y} \frac{1}{P(x_1, x_2, y)} \mathbb{E} \left[ \left( \hat{P}^{(M)}(x_1, x_2, y) - \hat{P}(x_1, x_2, y) \right)^2 \right] \\
&= \sum_{x_1, x_2, y} \frac{1}{P(x_1, x_2, y)} \left[ \mathbb{E} \left[ \left( \hat{P}^{(M)}(x_1, x_2, y) \right)^2 \right] - 2 \mathbb{E} \left[ \hat{P}^{(M)}(x_1, x_2, y) \hat{P}(x_1, x_2, y) \right] \right. \\
&\quad \left. + \mathbb{E} \left[ \left( \hat{P}(x_1, x_2, y) \right)^2 \right] \right] \\
&= \sum_{x_1, x_2, y} \frac{1}{P(x_1, x_2, y)} \left[ \frac{(n-1)(n-2)(n-3)}{n^3} \left( P^{(M)}(x_1, x_2, y) \right)^2 \right. \\
&\quad + \frac{2(n-1)(n-2)}{n^3} P(x_1|y) P(x_2|y) \left( P(x_1, x_2, y) + P(x_1, y) + P(x_2, y) \right) \\
&\quad + \frac{(n-1)}{n^3} \left[ 2P(x_1, x_2|y) \left( P(x_1, x_2|y) + P(x_1|y) + P(x_2|y) \right) + P(x_1|y) P(x_2|y) \right] \\
&\quad \left. + \frac{1}{n^3} \frac{1}{P(y)} P(x_1, x_2|y) \right]
\end{aligned}$$

$$\begin{aligned}
& -2 \sum_{x_1, x_2, y} \frac{1}{P(x_1, x_2, y)} \left[ \frac{(n-1)(n-2)}{n^2} P(x_1, x_2, y) P^{(M)}(x_1, x_2, y) + \frac{1}{n^2} P(x_1, x_2|y) \right. \\
& \quad \left. + \frac{n-1}{n^2} P(x_1, x_2|y) (P(x_1, x_2, y) + P(x_1, y) + P(x_2, y)) \right] \\
& + \sum_{x_1, x_2, y} \frac{1}{P(x_1, x_2, y)} \left( \frac{n-1}{n} P^2(x_1, x_2, y) + \frac{1}{n} P(x_1, x_2, y) \right) \tag{21} \\
& = \frac{(n-1)(n-2)(n-3)}{n^3} \left( \chi^2(P_{X_1 X_2 Y}, P_{X_1 X_2 Y}^{(M)}) + 1 \right) \\
& + \frac{2(n-1)(n-2)}{n^3} \left[ \sum_{x_2, y} \chi^2(P_{X_1|X_2 Y}, P_{X_1|Y}) + \sum_{x_1, y} \chi^2(P_{X_2|X_1 Y}, P_{X_2|Y}) \right. \\
& \quad \left. + |\mathcal{Y}| (|\mathcal{X}_1| + |\mathcal{X}_2| + 1) \right] \\
& + \frac{(n-1)}{n^3} \sum_y \frac{1}{P(y)} \left( \sum_{x_1, x_2} \frac{P(x_1|y)P(x_2|y)}{P(x_1, x_2|y)} + 2(|\mathcal{X}_1| + |\mathcal{X}_2| + 1) \right) \\
& + \frac{|\mathcal{X}_1||\mathcal{X}_2|}{n^3} \sum_y \frac{1}{(P(y))^2} - \frac{2(n-1)(n-2)}{n^2} - \frac{2|\mathcal{X}_1||\mathcal{X}_2|}{n^2} \sum_y \frac{1}{P(y)} \\
& - \frac{2(n-1)}{n^2} |\mathcal{Y}| (|\mathcal{X}_1| + |\mathcal{X}_2| + 1) + 1 + \frac{1}{n} (|\mathcal{X}_1||\mathcal{X}_2||\mathcal{Y}| - 1) \tag{22}
\end{aligned}$$

37

$$\begin{aligned}
& = \frac{(n-1)(n-2)(n-3)}{n^3} \chi^2(P_{X_1 X_2 Y}, P_{X_1 X_2 Y}^{(M)}) \\
& + \frac{2(n-1)(n-2)}{n^3} \left[ \sum_{x_2, y} \chi^2(P_{X_1|X_2 Y}, P_{X_1|Y}) + \sum_{x_1, y} \chi^2(P_{X_2|X_1 Y}, P_{X_2|Y}) \right] \\
& + \frac{(n-1)}{n^3} \sum_y \frac{1}{P(y)} \sum_{x_1, x_2} \frac{P(x_1|y)P(x_2|y) - P(x_1, x_2|y)}{P(x_1, x_2|y)} \\
& + \sum_y \frac{1}{P(y)} \left[ \frac{2(n-1)}{n^3} (|\mathcal{X}_1| + |\mathcal{X}_2| + 1) - \frac{(n+1)}{n^3} |\mathcal{X}_1||\mathcal{X}_2| \right] + \frac{|\mathcal{X}_1||\mathcal{X}_2|}{n^3} \sum_y \frac{1}{(P(y))^2} \\
& - \frac{4(n-1)}{n^3} |\mathcal{Y}| (|\mathcal{X}_1| + |\mathcal{X}_2| + 1) + \frac{1}{n} |\mathcal{X}_1||\mathcal{X}_2||\mathcal{Y}| - \frac{(n-1)(n-6)}{n^3}, \tag{23}
\end{aligned}$$

38 where to obtain (21), we have used (10)-(12); to obtain (22), we have used the fact that for a random  
 39 variable  $Z$  and its distributions  $P_Z, Q_Z$ , we have that  $\sum_z \frac{(Q_Z(z) - P_Z(z))^2}{P_Z(z)} = \chi^2(P_Z, Q_Z) + 1$ .

40 From (18), (20), and (23), we obtain the expressions of the Theorem 3.

## 41 C Detailed Statement and Proof of Theorem 5

### 42 C.1 Detailed Statement of Theorem 5

43 We first give the statement and proof of Theorem 5 when  $k = 2$ . In Theorem 5, we adopt the  
 44 factorization form to give the calculation of the optimal coefficient  $\alpha^*$  using features. Now, we give  
 45 the detailed form of the optimal  $\alpha^*$ . The numerator of it consists of 5 different terms, while the  
 46 denominator consists of 13 different terms. All these terms can be calculated by different empirical  
 47 means of training features  $\mathbf{f}$  and  $\mathbf{g}$ .

$$\alpha^* = \frac{a}{b},$$

48 where

$$\begin{aligned}
a &\triangleq \sum_y \left( \frac{1}{n^2} - \frac{1}{n} P(y) \right) \sum_{x'_1, x'_2} \sum_{x''_1, x''_2} \mathbf{f}^T(x'_1, x'_2) \Lambda_{\mathbf{f}}^{-1} \mathbf{f}(x''_1, x''_2) P(x'_1, x'_2 | y) P(x''_1, x''_2 | y) \\
&\quad + \sum_y \left( \frac{1}{n} - \frac{1}{n^2 P(y)} \right) \sum_{x'_1, x'_2} \mathbf{f}^T(x'_1, x'_2) \Lambda_{\mathbf{f}}^{-1} \mathbf{f}(x'_1, x'_2) P(x'_1, x'_2 | y) \\
&\quad + \frac{2(n-1)}{n^2} \sum_y P(y) \sum_{x'_1, x'_2} \sum_{x''_1, x''_2} \mathbf{f}^T(x'_1, x'_2) \Lambda_{\mathbf{f}}^{-1} \mathbf{f}(x'_1, x'_2) P(x'_1, x'_2 | y) P(x''_1 | y) P(x''_2 | y) \\
&\quad - \frac{(n-1)}{n^2} \sum_y \sum_{x'_1} \sum_{x'_2, x''_2} \mathbf{f}^T(x'_1, x'_2) \Lambda_{\mathbf{f}}^{-1} \mathbf{f}(x'_1, x''_2) P(x'_1, x'_2 | y) P(x''_2 | y) \\
&\quad - \frac{(n-1)}{n^2} \sum_y \sum_{x'_2} \sum_{x'_1, x''_1} \mathbf{f}^T(x'_1, x'_2) \Lambda_{\mathbf{f}}^{-1} \mathbf{f}(x''_1, x'_2) P(x'_1, x'_2 | y) P(x''_1 | y) \\
b &\triangleq \frac{(n-1)(n-2)(n-3)}{n^3} \sum_y \frac{1}{P(y)} \sum_{x'_1, x'_2} \sum_{x''_1, x''_2} \mathbf{f}^T(x'_1, x'_2) \Lambda_{\mathbf{f}}^{-1} \mathbf{f}(x''_1, x''_2) P(x'_1 | y) P(x'_2 | y) P(x''_1 | y) P(x''_2 | y) \\
&\quad + \sum_y \left[ \frac{2(n-1)(n-2)}{n^3} - \frac{2(n-1)(n-2)}{n^2} P(y) \right] \\
&\quad \quad \cdot \sum_{x'_1, x'_2} \sum_{x''_1, x''_2} \mathbf{f}^T(x'_1, x'_2) \Lambda_{\mathbf{f}}^{-1} \mathbf{f}(x''_1, x''_2) P(x'_1, x'_2 | y) P(x''_1 | y) P(x''_2 | y) \\
&\quad + \frac{(n-1)(n-2)}{n^3} \sum_y \sum_{x'_1} \sum_{x'_2, x''_2} \mathbf{f}^T(x'_1, x'_2) \Lambda_{\mathbf{f}}^{-1} \mathbf{f}(x'_1, x''_2) P(x'_1 | y) P(x'_2 | y) P(x''_2 | y) \\
&\quad + \frac{2(n-1)(n-2)}{n^3} \sum_y \sum_{x'_1, x'_2} \sum_{x''_1, x''_2} \mathbf{f}^T(x'_1, x'_2) \Lambda_{\mathbf{f}}^{-1} \mathbf{f}(x''_1, x''_2) P(x'_1, x'_2 | y) P(x''_1 | y) P(x''_2 | y) \\
&\quad + \frac{(n-1)(n-2)}{n^3} \sum_y \sum_{x'_2} \sum_{x'_1, x''_1} \mathbf{f}^T(x'_1, x'_2) \Lambda_{\mathbf{f}}^{-1} \mathbf{f}(x''_1, x'_2) P(x'_1 | y) P(x'_2 | y) P(x''_1 | y) \\
&\quad + \frac{n-1}{n^3} \sum_y \frac{1}{P(y)} \sum_{x'_2} \sum_{x'_1, x''_1} \mathbf{f}^T(x'_1, x'_2) \Lambda_{\mathbf{f}}^{-1} \mathbf{f}(x''_1, x'_2) P(x'_1 | y) P(x'_2 | y) P(x''_1 | y) \\
&\quad + \frac{n-1}{n^3} \sum_y \frac{1}{P(y)} \sum_{x'_1} \sum_{x'_2, x''_2} \mathbf{f}^T(x'_1, x'_2) \Lambda_{\mathbf{f}}^{-1} \mathbf{f}(x'_1, x''_2) P(x'_2 | y) P(x'_1, x''_2 | y) \\
&\quad + \sum_y \left[ \frac{n-1}{n^3} \frac{1}{P(y)} - \frac{2(n-1)}{n^2} \right] \sum_{x'_2} \sum_{x'_1, x''_1} \mathbf{f}^T(x'_1, x'_2) \Lambda_{\mathbf{f}}^{-1} \mathbf{f}(x''_1, x'_2) P(x''_1 | y) P(x'_1, x'_2 | y) \\
&\quad + \sum_y \left[ \frac{n-1}{n^3} \frac{1}{P(y)} - \frac{2(n-1)}{n^2} \right] \sum_{x'_1} \sum_{x'_2, x''_2} \mathbf{f}^T(x'_1, x'_2) \Lambda_{\mathbf{f}}^{-1} \mathbf{f}(x'_1, x''_2) P(x''_2 | y) P(x'_1, x'_2 | y) \\
&\quad + \sum_y \left[ \frac{n-1}{n^3} \frac{1}{P(y)} - \frac{2(n-1)}{n^2} + \frac{n-1}{n} P(y) \right] \\
&\quad \quad \cdot \sum_{x'_1, x'_2} \sum_{x''_1, x''_2} \mathbf{f}^T(x'_1, x'_2) \Lambda_{\mathbf{f}}^{-1} \mathbf{f}(x''_1, x''_2) P(x'_1, x'_2 | y) P(x''_1, x''_2 | y) \\
&\quad + \frac{n-1}{n^3} \sum_y \frac{1}{P(y)} \sum_{x'_1, x'_2} \sum_{x''_1, x''_2} \mathbf{f}^T(x'_1, x'_2) \Lambda_{\mathbf{f}}^{-1} \mathbf{f}(x''_1, x''_2) P(x'_1, x'_2 | y) P(x''_1, x''_2 | y) \\
&\quad + \frac{n-1}{n^3} \sum_y \frac{1}{P(y)} \sum_{x'_1, x'_2} \mathbf{f}^T(x'_1, x'_2) \Lambda_{\mathbf{f}}^{-1} \mathbf{f}(x'_1, x'_2) P(x'_1 | y) P(x'_2 | y) \\
&\quad + \sum_y \left[ \frac{1}{n^3} \frac{1}{P^2(y)} - \frac{2}{n^2 P(y)} + 1 \right] \sum_{x'_1, x'_2} \mathbf{f}^T(x'_1, x'_2) \Lambda_{\mathbf{f}}^{-1} \mathbf{f}(x'_1, x'_2) P(x'_1, x'_2 | y).
\end{aligned}$$

49 **C.2 Proof of Theorem 5**

50 We first give the expressions of the optimal weight  $\mathbf{g}^*$ . We rewrite the expression of the training loss  
 51 function as the following.

$$\begin{aligned}
 \tilde{\mathcal{L}}_{\text{train}}(\mathbf{f}, \mathbf{g}) &\triangleq (1 - \alpha) \chi_R^2 \left( \hat{P}_{X_1 X_2 Y}, \hat{P}_{X_1 X_2} \tilde{P}_{Y|X_1 X_2}^{(\mathbf{f}, \mathbf{g})} \right) + \alpha \chi_R^2 \left( \hat{P}_{X_1 X_2 Y}^{(M)}, \hat{P}_{X_1 X_2} \tilde{P}_{Y|X_1 X_2}^{(\mathbf{f}, \mathbf{g})} \right) \\
 &= (1 - \alpha) \sum_{x_1, x_2, y} \frac{(Q(x_1, x_2, y) - \hat{P}(x_1, x_2, y))^2}{R(x_1, x_2, y)} \\
 &\quad + \alpha \sum_{x_1, x_2, y} \frac{(Q(x_1, x_2, y) - \hat{P}^{(M)}(x_1, x_2, y))^2}{R(x_1, x_2, y)} \\
 &= \sum_{x_1, x_2, y} \frac{P^2(x_1, x_2) P^2(y)}{R(x_1, x_2, y)} \left( 1 + 2\mathbf{f}^T(x_1, x_2) \mathbf{g}(y) + \mathbf{g}^T(y) \mathbf{f}(x_1, x_2) \mathbf{f}^T(x_1, x_2) \mathbf{g}(y) \right) \\
 &\quad - \frac{2P(x_1, x_2) P(y)}{R(x_1, x_2, y)} \left[ (1 - \alpha) \hat{P}(x_1, x_2, y) + \alpha \hat{P}^{(M)}(x_1, x_2, y) \right] (1 + \mathbf{f}^T(x_1, x_2) \mathbf{g}(y)) \\
 &\quad + \frac{(1 - \alpha) \hat{P}^2(x_1, x_2, y) + \alpha (\hat{P}^{(M)}(x_1, x_2, y))^2}{R(x_1, x_2, y)},
 \end{aligned}$$

52 where we define  $Q(x_1, x_2, y) \triangleq [\hat{P}_{X_1 X_2} \tilde{P}_{Y|X_1 X_2}^{(\mathbf{f}, \mathbf{g})}](x_1, x_2, y)$ .

53 Thus, the differentiation of the training loss function over  $\mathbf{g}(y')$  is as follows.

$$\begin{aligned}
 \frac{\partial \tilde{\mathcal{L}}_{\text{train}}(\mathbf{f}, \mathbf{g})}{\partial \mathbf{g}(y')} &= \sum_{x_1, x_2} \frac{P^2(x_1, x_2) P^2(y')}{R(x_1, x_2, y')} \left( 2\mathbf{f}(x_1, x_2) + 2\mathbf{f}(x_1, x_2) \mathbf{f}^T(x_1, x_2) \mathbf{g}(y') \right) \\
 &\quad - \frac{2P(x_1, x_2) P(y')}{R(x_1, x_2, y')} \left[ (1 - \alpha) \hat{P}(x_1, x_2, y') + \alpha \hat{P}^{(M)}(x_1, x_2, y') \right] \mathbf{f}(x_1, x_2) \\
 &= \sum_{x_1, x_2} P(x_1, x_2) P(y') \left( 2\mathbf{f}(x_1, x_2) + 2\mathbf{f}(x_1, x_2) \mathbf{f}^T(x_1, x_2) \mathbf{g}(y') \right) \\
 &\quad - 2 \left[ (1 - \alpha) \hat{P}(x_1, x_2, y') + \alpha \hat{P}^{(M)}(x_1, x_2, y') \right] \mathbf{f}(x_1, x_2) \tag{24}
 \end{aligned}$$

$$\begin{aligned}
 &= 2P(y') \Lambda_{\mathbf{f}} \mathbf{g}(y') - 2 \sum_{x_1, x_2} \left[ (1 - \alpha) \hat{P}(x_1, x_2, y') + \alpha \hat{P}^{(M)}(x_1, x_2, y') \right] \mathbf{f}(x_1, x_2), \\
 &\tag{25}
 \end{aligned}$$

54 where we obtain (24) by using the definition of  $R(x_1, x_2, y) \triangleq P(x_1, x_2) P(y)$ ; and we obtain (25)  
 55 from the assumption that  $\sum_{x_1, x_2} P(x_1, x_2) \mathbf{f}(x_1, x_2) = 0$ , and we have also used the notation that

56  $\Lambda_{\mathbf{f}} \triangleq \sum_{x_1, x_2} P(x_1, x_2) \mathbf{f}(x_1, x_2) \mathbf{f}^T(x_1, x_2)$ .  
 57

58 Set the gradient to zero, we obtain the optimal weights  $\mathbf{g}^*(y')$ .

$$\mathbf{g}^*(y') = \frac{1}{P(y')} \Lambda_{\mathbf{f}}^{-1} \sum_{x_1, x_2} \left[ (1 - \alpha) \hat{P}(x_1, x_2, y') + \alpha \hat{P}^{(M)}(x_1, x_2, y') \right] \mathbf{f}(x_1, x_2). \tag{26}$$

59 Then, we give the proof. At first, we have the following three lemmas.

60 **Lemma 2.** *We have*

$$\begin{aligned}\mathbb{E}[\hat{P}(x'_1, x'_2, y)\hat{P}(x''_1, x''_2, y)] &= \frac{n-1}{n}P(x'_1, x'_2, y)P(x''_1, x''_2, y) \\ &\quad + \frac{1}{n}P(x'_1, x'_2, y)\mathbb{1}\{(x'_1, x'_2) = (x''_1, x''_2)\}.\end{aligned}\quad (27)$$

$$\begin{aligned}\mathbb{E}[\hat{P}(x'_1, x'_2, y)\hat{P}^{(M)}(x''_1, x''_2, y)] &= \frac{(n-1)(n-2)}{n^2}P(x'_1, x'_2, y)P^{(M)}(x''_1, x''_2, y) \\ &\quad + \frac{n-1}{n^2}P(x'_1, x'_2|y)P(x''_2, y)\mathbb{1}\{x'_1 = x''_1\} \\ &\quad + \frac{n-1}{n^2}P(x'_1, x'_2|y)P(x''_1, y)\mathbb{1}\{x'_2 = x''_2\} \\ &\quad + \frac{n-1}{n^2}P(x'_1, x'_2|y)P(x''_1, x''_2, y) \\ &\quad + \frac{1}{n^2}P(x'_1, x'_2|y)\mathbb{1}\{(x'_1, x'_2) = (x''_1, x''_2)\}.\end{aligned}\quad (28)$$

61 **Lemma 3.** *We have*

$$\begin{aligned}\mathbb{E}[\hat{P}^{(M)}(x'_1, x'_2, y)\hat{P}^{(M)}(x''_1, x''_2, y)] &= \frac{(n-1)(n-2)(n-3)}{n^3}P^{(M)}(x'_1, x'_2, y)P^{(M)}(x''_1, x''_2, y) \\ &\quad + \frac{(n-1)(n-2)}{n^3P^2(y)}\left(P(x'_1, x'_2, y)P(x''_1, y)P(x''_2, y) + P(x'_1, y)P(x'_2, y)P(x''_2, y)\mathbb{1}\{x'_1 = x''_1\}\right. \\ &\quad \left.+ P(x'_1, x'_2, y)P(x''_1, y)P(x'_2, y) + P(x''_1, x'_2, y)P(x'_1, y)P(x'_2, y)\right. \\ &\quad \left.+ P(x'_1, y)P(x'_2, y)P(x''_1, y)\mathbb{1}\{x'_2 = x''_2\} + P(x'_1, y)P(x'_2, y)P(x''_1, x''_2, y)\right) \\ &\quad + \frac{(n-1)}{n^3P^2(y)}\left(P(x'_1, y)P(x''_1, x''_2, y)\mathbb{1}\{x'_2 = x''_2\} + P(x'_2, y)P(x''_1, x''_2, y)\mathbb{1}\{x'_1 = x''_1\}\right. \\ &\quad \left.+ P(x''_1, y)P(x'_1, x'_2, y)\mathbb{1}\{x'_2 = x''_2\} + P(x''_2, y)P(x'_1, x'_2, y)\mathbb{1}\{x'_1 = x''_1\}\right. \\ &\quad \left.+ P(x'_1, x'_2, y)P(x''_1, x''_2, y) + P(x'_1, x''_2, y)P(x''_1, x'_2, y)\right. \\ &\quad \left.+ P(x'_1, y)P(x'_2, y)\mathbb{1}\{(x'_1, x'_2) = (x''_1, x''_2)\}\right) \\ &\quad + \frac{1}{n^2P^2(y)}P(x'_1, x'_2, y)\mathbb{1}\{(x'_1, x'_2) = (x''_1, x''_2)\}.\end{aligned}\quad (29)$$

62 **Lemma 4.** *We have*

$$\begin{aligned}\sum_{x'_1, x'_2} \sum_{x''_1, x''_2} \sum_{x_1, x_2} P(x_1, x_2) \mathbf{f}^T(x_1, x_2) \Lambda_{\mathbf{f}}^{-1} \mathbf{f}(x'_1, x'_2) \mathbf{f}^T(x''_1, x''_2) \Lambda_{\mathbf{f}}^{-1} \mathbf{f}(x_1, x_2) \\ = \sum_{x'_1, x'_2} \sum_{x''_1, x''_2} \mathbf{f}^T(x'_1, x'_2) \Lambda_{\mathbf{f}}^{-1} \mathbf{f}(x''_1, x''_2)\end{aligned}\quad (30)$$

63 *Proof.* Notice that for vectors  $v_1, v_2$ , their inner product  $v_1^T v_2 = \text{tr}(v_2 \cdot v_1^T)$ . Thus, we have

$$\begin{aligned}\sum_{x'_1, x'_2} \sum_{x''_1, x''_2} \sum_{x_1, x_2} P(x_1, x_2) \mathbf{f}^T(x_1, x_2) \Lambda_{\mathbf{f}}^{-1} \mathbf{f}(x'_1, x'_2) \mathbf{f}^T(x''_1, x''_2) \Lambda_{\mathbf{f}}^{-1} \mathbf{f}(x_1, x_2) \\ = \sum_{x'_1, x'_2} \sum_{x''_1, x''_2} \sum_{x_1, x_2} P(x_1, x_2) \text{tr}\left(\mathbf{f}(x_1, x_2) \mathbf{f}^T(x_1, x_2) \Lambda_{\mathbf{f}}^{-1} \mathbf{f}(x'_1, x'_2) \mathbf{f}^T(x''_1, x''_2) \Lambda_{\mathbf{f}}^{-1}\right) \\ = \sum_{x'_1, x'_2} \sum_{x''_1, x''_2} \text{tr}\left(\sum_{x_1, x_2} P(x_1, x_2) \mathbf{f}(x_1, x_2) \mathbf{f}^T(x_1, x_2) \Lambda_{\mathbf{f}}^{-1} \mathbf{f}(x'_1, x'_2) \mathbf{f}^T(x''_1, x''_2) \Lambda_{\mathbf{f}}^{-1}\right) \\ = \sum_{x'_1, x'_2} \sum_{x''_1, x''_2} \text{tr}\left(\Lambda_{\mathbf{f}} \Lambda_{\mathbf{f}}^{-1} \mathbf{f}(x'_1, x'_2) \mathbf{f}^T(x''_1, x''_2) \Lambda_{\mathbf{f}}^{-1}\right) \\ = \sum_{x'_1, x'_2} \sum_{x''_1, x''_2} \mathbf{f}^T(x'_1, x'_2) \Lambda_{\mathbf{f}}^{-1} \mathbf{f}(x''_1, x''_2)\end{aligned}$$



65 Then, we give

$$\begin{aligned}
\langle \mathbf{f}(x_1, x_2), \mathbf{g}^*(y) \rangle &= \frac{\mathbf{f}^T(x_1, x_2)}{P(y)} \Lambda_{\mathbf{f}}^{-1} \sum_{x_1, x_2} \left[ (1 - \alpha) \hat{P}(x_1, x_2, y) + \alpha \hat{P}^{(M)}(x_1, x_2, y) \right] \mathbf{f}(x_1, x_2) \\
&= \frac{1}{P(y)} \mathbf{f}^T(x_1, x_2) \Lambda_{\mathbf{f}}^{-1} \sum_{x'_1, x'_2} \hat{P}(x'_1, x'_2, y) \mathbf{f}(x'_1, x'_2) \\
&\quad - \alpha \cdot \frac{1}{P(y)} \mathbf{f}^T(x_1, x_2) \Lambda_{\mathbf{f}}^{-1} \sum_{x'_1, x'_2} \left( \hat{P}(x'_1, x'_2, y) - \hat{P}^{(M)}(x'_1, x'_2, y) \right) \mathbf{f}(x'_1, x'_2) \\
&= \hat{a}_1(x_1, x_2, y) - \alpha \hat{a}_2(x_1, x_2, y),
\end{aligned}$$

66 where

$$\begin{aligned}
\hat{a}_1(x_1, x_2, y) &\triangleq \frac{1}{P(y)} \mathbf{f}^T(x_1, x_2) \Lambda_{\mathbf{f}}^{-1} \sum_{x'_1, x'_2} \hat{P}(x'_1, x'_2, y) \mathbf{f}(x'_1, x'_2), \\
\hat{a}_2(x_1, x_2, y) &\triangleq \frac{1}{P(y)} \mathbf{f}^T(x_1, x_2) \Lambda_{\mathbf{f}}^{-1} \sum_{x'_1, x'_2} \left( \hat{P}(x'_1, x'_2, y) - \hat{P}^{(M)}(x'_1, x'_2, y) \right) \mathbf{f}(x'_1, x'_2).
\end{aligned}$$

67 Now, we give the testing loss as

$$\tilde{\mathcal{L}}_{\text{test}}(\alpha) = \mathbb{E}[\chi_R^2(P_{X_1 X_2 Y}, P_{X_1 X_2} Q_{Y|X_1 X_2}^\alpha)] \quad (31)$$

68

$$\begin{aligned}
&= \sum_{x_1, x_2, y} R(x_1, x_2, y) \mathbb{E}[\langle \mathbf{f}(x_1, x_2), \mathbf{g}^*(y) \rangle^2] \\
&\quad + 2 \sum_{x_1, x_2, y} (R(x_1, x_2, y) - P(x_1, x_2, y)) \mathbb{E}[\langle \mathbf{f}(x_1, x_2), \mathbf{g}^*(y) \rangle] + \chi_R^2(R_{X_1 X_2 Y}, P_{X_1 X_2 Y}) \\
&= \alpha^2 \sum_{x_1, x_2, y} R(x_1, x_2, y) \mathbb{E}[\hat{a}_2^2(x_1, x_2, y)] \quad (32)
\end{aligned}$$

$$\begin{aligned}
&\quad - 2\alpha \sum_{x_1, x_2, y} (R(x_1, x_2, y) \mathbb{E}[\hat{a}_1(x_1, x_2, y) \cdot \hat{a}_2(x_1, x_2, y)] \\
&\quad \quad + (R(x_1, x_2, y) - P(x_1, x_2, y)) \mathbb{E}[\hat{a}_2(x_1, x_2, y)]) \quad (33) \\
&\quad + \sum_{x_1, x_2, y} (R(x_1, x_2, y) \mathbb{E}[\hat{a}_1^2(x_1, x_2, y)] + 2(R(x_1, x_2, y) - P(x_1, x_2, y)) \mathbb{E}[\hat{a}_1(x_1, x_2, y)]) \\
&\quad + \chi_R^2(R_{X_1 X_2 Y}, P_{X_1 X_2 Y})
\end{aligned}$$

69 Thus, the optimal  $\alpha^*$  is

$$\begin{aligned}
\alpha^* &= \frac{\sum_{x_1, x_2, y} R(x_1, x_2, y) \mathbb{E}[\hat{a}_1(x_1, x_2, y) \cdot \hat{a}_2(x_1, x_2, y)]}{\sum_{x_1, x_2, y} R(x_1, x_2, y) \mathbb{E}[\hat{a}_2^2(x_1, x_2, y)]} \\
&\quad + \frac{\sum_{x_1, x_2, y} (R(x_1, x_2, y) - P(x_1, x_2, y)) \mathbb{E}[\hat{a}_2(x_1, x_2, y)]}{\sum_{x_1, x_2, y} R(x_1, x_2, y) \mathbb{E}[\hat{a}_2^2(x_1, x_2, y)]}. \quad (34)
\end{aligned}$$

70 Next, we calculate the three summations in (34).

71 At first, we derive  $\sum_{x_1, x_2, y} (R(x_1, x_2, y) - P(x_1, x_2, y)) \mathbb{E}[\hat{a}_2(x_1, x_2, y)]$ .

$$\begin{aligned}
& \sum_{x_1, x_2, y} (R(x_1, x_2, y) - P(x_1, x_2, y)) \mathbb{E}[\hat{a}_2(x_1, x_2, y)] \\
&= \sum_{x_1, x_2, y} \mathbb{E} \left[ \frac{1}{P(y)} \mathbf{f}^T(x_1, x_2) \Lambda_{\mathbf{f}}^{-1} \sum_{x'_1, x'_2} \left( \hat{P}(x'_1, x'_2, y) - \hat{P}^{(M)}(x'_1, x'_2, y) \right) \mathbf{f}(x'_1, x'_2) \right] \\
&\quad \cdot (P(x_1, x_2)P(y) - P(x_1, x_2, y)) \\
&= \sum_y \left( \sum_{x_1, x_2} (P(x_1, x_2) - P(x_1, x_2|y)) \right) \mathbf{f}^T(x_1, x_2) \Lambda_{\mathbf{f}}^{-1} \\
&\quad \cdot \sum_{x'_1, x'_2} \left[ P(x'_1, x'_2, y) - \left( P^{(M)}(x'_1, x'_2, y) + \frac{1}{n} (P(x'_1, x'_2|y) - P^{(M)}(x'_1, x'_2, y)) \right) \right] \mathbf{f}(x'_1, x'_2)
\end{aligned} \tag{35}$$

$$\begin{aligned}
&= - \sum_y \sum_{x_1, x_2} P(x_1, x_2|y) \mathbf{f}^T(x_1, x_2) \Lambda_{\mathbf{f}}^{-1} \\
&\quad \cdot \sum_{x'_1, x'_2} \left[ P(x'_1, x'_2, y) - \left( P^{(M)}(x'_1, x'_2, y) + \frac{1}{n} (P(x'_1, x'_2|y) - P^{(M)}(x'_1, x'_2, y)) \right) \right] \mathbf{f}(x'_1, x'_2)
\end{aligned} \tag{36}$$

$$\begin{aligned}
&= - \sum_y P(y) \left[ \sum_{x_1, x_2} P(x_1, x_2|y) \mathbf{f}^T(x_1, x_2) \right] \Lambda_{\mathbf{f}}^{-1} \left[ \sum_{x'_1, x'_2} (P(x'_1, x'_2|y) - P(x'_1|y)P(x'_2|y)) \mathbf{f}(x'_1, x'_2) \right] \\
&\quad + \frac{1}{n} \sum_y \left[ \sum_{x_1, x_2} P(x_1, x_2|y) \mathbf{f}^T(x_1, x_2) \right] \Lambda_{\mathbf{f}}^{-1} \left[ \sum_{x'_1, x'_2} \left( P(x'_1, x'_2|y) - P^{(M)}(x'_1, x'_2, y) \right) \mathbf{f}(x'_1, x'_2) \right],
\end{aligned} \tag{37}$$

72 where we obtain (36) from the fact that  $\sum_{x_1, x_2} P(x_1, x_2) \mathbf{f}(x_1, x_2) = 0$ .

73 Then, we derive  $\sum_{x_1, x_2, y} R(x_1, x_2, y) \mathbb{E}[\hat{a}_1(x_1, x_2, y) \cdot \hat{a}_2(x_1, x_2, y)]$ .

$$\begin{aligned}
& \sum_{x_1, x_2, y} R(x_1, x_2, y) \mathbb{E}[\hat{a}_1(x_1, x_2, y) \cdot \hat{a}_2(x_1, x_2, y)] \\
&= \sum_{x_1, x_2, y} P(x_1, x_2) P(y) \mathbb{E} \left[ \frac{1}{P(y)} \mathbf{f}^T(x_1, x_2) \Lambda_{\mathbf{f}}^{-1} \sum_{x'_1, x'_2} \hat{P}(x'_1, x'_2, y) \mathbf{f}(x'_1, x'_2) \right. \\
&\quad \cdot \left. \frac{1}{P(y)} \mathbf{f}^T(x_1, x_2) \Lambda_{\mathbf{f}}^{-1} \sum_{x''_1, x''_2} \left( \hat{P}(x''_1, x''_2, y) - \hat{P}^{(M)}(x''_1, x''_2, y) \right) \mathbf{f}(x''_1, x''_2) \right] \\
&= \sum_y \frac{1}{P(y)} \sum_{x'_1, x'_2} \sum_{x''_1, x''_2} \mathbf{f}^T(x'_1, x'_2) \Lambda_{\mathbf{f}}^{-1} \mathbf{f}(x''_1, x''_2) \mathbb{E} \left[ \hat{P}(x'_1, x'_2, y) \hat{P}(x''_1, x''_2, y) \right] \\
&\quad - \sum_y \frac{1}{P(y)} \sum_{x'_1, x'_2} \sum_{x''_1, x''_2} \mathbf{f}^T(x'_1, x'_2) \Lambda_{\mathbf{f}}^{-1} \mathbf{f}(x''_1, x''_2) \mathbb{E} \left[ \hat{P}(x'_1, x'_2, y) \hat{P}^{(M)}(x''_1, x''_2, y) \right] \\
&= \frac{n-1}{n} \sum_y \frac{1}{P(y)} \sum_{x'_1, x'_2} \sum_{x''_1, x''_2} \mathbf{f}^T(x'_1, x'_2) \Lambda_{\mathbf{f}}^{-1} \mathbf{f}(x''_1, x''_2) P(x'_1, x'_2, y) P(x''_1, x''_2, y) \\
&\quad + \frac{1}{n} \sum_y \frac{1}{P(y)} \sum_{x'_1, x'_2} \mathbf{f}^T(x'_1, x'_2) \Lambda_{\mathbf{f}}^{-1} \mathbf{f}(x'_1, x'_2) P(x'_1, x'_2, y) \\
&\quad - \frac{(n-1)(n-2)}{n^2} \sum_y \frac{1}{P(y)} \sum_{x'_1, x'_2} \sum_{x''_1, x''_2} \mathbf{f}^T(x'_1, x'_2) \Lambda_{\mathbf{f}}^{-1} \mathbf{f}(x''_1, x''_2) P(x'_1, x'_2, y) P^{(M)}(x''_1, x''_2, y)
\end{aligned} \tag{38}$$

$$\begin{aligned}
& - \frac{(n-1)}{n^2} \sum_y \frac{1}{P(y)} \sum_{x'_1, x'_2} \sum_{x''_1, x''_2} \mathbf{f}^\top(x'_1, x'_2) \Lambda_{\mathbf{f}}^{-1} \mathbf{f}(x''_1, x''_2) P(x'_1, x'_2, y) P(x''_1, x''_2 | y) \\
& - \frac{(n-1)}{n^2} \sum_y \frac{1}{P(y)} \sum_{x'_1} \sum_{x'_2, x''_2} \mathbf{f}^\top(x'_1, x'_2) \Lambda_{\mathbf{f}}^{-1} \mathbf{f}(x'_1, x''_2) P(x'_1, x'_2 | y) P(x''_2, y) \\
& - \frac{(n-1)}{n^2} \sum_y \frac{1}{P(y)} \sum_{x'_2} \sum_{x'_1, x''_1} \mathbf{f}^\top(x'_1, x'_2) \Lambda_{\mathbf{f}}^{-1} \mathbf{f}(x''_1, x'_2) P(x'_1, x'_2 | y) P(x''_1, y) \\
& - \frac{1}{n^2} \sum_y \frac{1}{P(y)} \sum_{x'_1, x'_2} \mathbf{f}^\top(x'_1, x'_2) \Lambda_{\mathbf{f}}^{-1} \mathbf{f}(x'_1, x'_2) P(x'_1, x'_2 | y), \tag{39}
\end{aligned}$$

75 where we obtain (38) from (30), and we obtain (39) from (27) and (28).

76 Thus, we have the numerator of the optimal coefficient  $\alpha^*$ .

$$\begin{aligned}
& \sum_{x_1, x_2, y} R(x_1, x_2, y) \mathbb{E}[\hat{a}_1(x_1, x_2, y) \cdot \hat{a}_2(x_1, x_2, y)] \\
& + \sum_{x_1, x_2, y} (R(x_1, x_2, y) - P(x_1, x_2, y)) \mathbb{E}[\hat{a}_2(x_1, x_2, y)] \\
& = \sum_y \left( \frac{1}{n^2} - \frac{1}{n} P(y) \right) \sum_{x'_1, x'_2} \sum_{x''_1, x''_2} \mathbf{f}^\top(x'_1, x'_2) \Lambda_{\mathbf{f}}^{-1} \mathbf{f}(x''_1, x''_2) P(x'_1, x'_2 | y) P(x''_1, x''_2 | y) \\
& + \sum_y \left( \frac{1}{n} - \frac{1}{n^2 P(y)} \right) \sum_{x'_1, x'_2} \mathbf{f}^\top(x'_1, x'_2) \Lambda_{\mathbf{f}}^{-1} \mathbf{f}(x'_1, x'_2) P(x'_1, x'_2 | y) \\
& + \frac{2(n-1)}{n^2} \sum_y P(y) \sum_{x'_1, x'_2} \sum_{x''_1, x''_2} \mathbf{f}^\top(x'_1, x'_2) \Lambda_{\mathbf{f}}^{-1} \mathbf{f}(x'_1, x'_2) P(x'_1, x'_2 | y) P(x''_1 | y) P(x''_2 | y) \\
& - \frac{(n-1)}{n^2} \sum_y \sum_{x'_1} \sum_{x'_2, x''_2} \mathbf{f}^\top(x'_1, x'_2) \Lambda_{\mathbf{f}}^{-1} \mathbf{f}(x'_1, x''_2) P(x'_1, x'_2 | y) P(x''_2 | y) \\
& - \frac{(n-1)}{n^2} \sum_y \sum_{x'_2} \sum_{x'_1, x''_1} \mathbf{f}^\top(x'_1, x'_2) \Lambda_{\mathbf{f}}^{-1} \mathbf{f}(x''_1, x'_2) P(x'_1, x'_2 | y) P(x''_1 | y) \tag{40}
\end{aligned}$$

77 Next, we derive the denominator

$$\begin{aligned}
& \sum_{x_1, x_2, y} R(x_1, x_2, y) \mathbb{E}[\hat{a}_2^2(x_1, x_2, y)] \\
& = \sum_{x_1, x_2, y} P(x_1, x_2) P(y) \mathbb{E} \left[ \frac{1}{P(y)} \mathbf{f}^\top(x_1, x_2) \Lambda_{\mathbf{f}}^{-1} \sum_{x'_1, x'_2} \left( \hat{P}(x'_1, x'_2, y) - \hat{P}^{(M)}(x'_1, x'_2, y) \right) \mathbf{f}(x'_1, x'_2) \right. \\
& \quad \cdot \left. \frac{1}{P(y)} \mathbf{f}^\top(x_1, x_2) \Lambda_{\mathbf{f}}^{-1} \sum_{x''_1, x''_2} \left( \hat{P}(x''_1, x''_2, y) - \hat{P}^{(M)}(x''_1, x''_2, y) \right) \mathbf{f}(x''_1, x''_2) \right] \\
& = \sum_y \frac{1}{P(y)} \sum_{x'_1, x'_2} \sum_{x''_1, x''_2} \mathbf{f}^\top(x'_1, x'_2) \Lambda_{\mathbf{f}}^{-1} \mathbf{f}(x''_1, x''_2) \\
& \quad \cdot \mathbb{E} \left[ \left( \hat{P}(x'_1, x'_2, y) - \hat{P}^{(M)}(x'_1, x'_2, y) \right) \left( \hat{P}(x''_1, x''_2, y) - \hat{P}^{(M)}(x''_1, x''_2, y) \right) \right] \tag{41}
\end{aligned}$$

$$\begin{aligned}
&= \sum_y \frac{1}{P(y)} \sum_{x'_1, x'_2} \sum_{x''_1, x''_2} \mathbf{f}^T(x'_1, x'_2) \Lambda_{\mathbf{f}}^{-1} \mathbf{f}(x''_1, x''_2) \mathbb{E} \left[ \hat{P}(x'_1, x'_2, y) \hat{P}(x''_1, x''_2, y) \right] \\
&\quad - 2 \sum_y \frac{1}{P(y)} \sum_{x'_1, x'_2} \sum_{x''_1, x''_2} \mathbf{f}^T(x'_1, x'_2) \Lambda_{\mathbf{f}}^{-1} \mathbf{f}(x''_1, x''_2) \mathbb{E} \left[ \hat{P}(x'_1, x'_2, y) \hat{P}^{(M)}(x''_1, x''_2, y) \right] \\
&\quad + \sum_y \frac{1}{P(y)} \sum_{x'_1, x'_2} \sum_{x''_1, x''_2} \mathbf{f}^T(x'_1, x'_2) \Lambda_{\mathbf{f}}^{-1} \mathbf{f}(x''_1, x''_2) \mathbb{E} \left[ \hat{P}^{(M)}(x'_1, x'_2, y) \hat{P}^{(M)}(x''_1, x''_2, y) \right] \\
&= \frac{(n-1)(n-2)(n-3)}{n^3} \sum_y \frac{1}{P(y)} \\
&\quad \cdot \sum_{x'_1, x'_2} \sum_{x''_1, x''_2} \mathbf{f}^T(x'_1, x'_2) \Lambda_{\mathbf{f}}^{-1} \mathbf{f}(x''_1, x''_2) P(x'_1|y) P(x'_2|y) P(x''_1|y) P(x''_2|y) \\
&\quad + \sum_y \left[ \frac{2(n-1)(n-2)}{n^3} - \frac{2(n-1)(n-2)}{n^2} P(y) \right] \\
&\quad \cdot \sum_{x'_1, x'_2} \sum_{x''_1, x''_2} \mathbf{f}^T(x'_1, x'_2) \Lambda_{\mathbf{f}}^{-1} \mathbf{f}(x''_1, x''_2) P(x'_1, x'_2|y) P(x''_1|y) P(x''_2|y) \\
&\quad + \frac{(n-1)(n-2)}{n^3} \sum_y \sum_{x'_1} \sum_{x'_2, x''_2} \mathbf{f}^T(x'_1, x'_2) \Lambda_{\mathbf{f}}^{-1} \mathbf{f}(x'_1, x''_2) P(x'_1|y) P(x'_2|y) P(x''_2|y) \\
&\quad + \frac{2(n-1)(n-2)}{n^3} \sum_y \sum_{x'_1, x'_2} \sum_{x''_1, x''_2} \mathbf{f}^T(x'_1, x'_2) \Lambda_{\mathbf{f}}^{-1} \mathbf{f}(x''_1, x''_2) P(x'_1, x''_2|y) P(x''_1|y) P(x'_2|y) \\
&\quad + \frac{(n-1)(n-2)}{n^3} \sum_y \sum_{x'_2} \sum_{x'_1, x''_1} \mathbf{f}^T(x'_1, x'_2) \Lambda_{\mathbf{f}}^{-1} \mathbf{f}(x''_1, x'_2) P(x'_1|y) P(x'_2|y) P(x''_1|y) \\
&\quad + \frac{n-1}{n^3} \sum_y \frac{1}{P(y)} \sum_{x'_2} \sum_{x'_1, x''_1} \mathbf{f}^T(x'_1, x'_2) \Lambda_{\mathbf{f}}^{-1} \mathbf{f}(x''_1, x'_2) P(x'_1|y) P(x''_1, x'_2|y) \\
&\quad + \frac{n-1}{n^3} \sum_y \frac{1}{P(y)} \sum_{x'_1} \sum_{x'_2, x''_2} \mathbf{f}^T(x'_1, x'_2) \Lambda_{\mathbf{f}}^{-1} \mathbf{f}(x'_1, x''_2) P(x'_2|y) P(x'_1, x''_2|y) \\
&\quad + \sum_y \left[ \frac{n-1}{n^3} \frac{1}{P(y)} - \frac{2(n-1)}{n^2} \right] \sum_{x'_2} \sum_{x'_1, x''_1} \mathbf{f}^T(x'_1, x'_2) \Lambda_{\mathbf{f}}^{-1} \mathbf{f}(x''_1, x'_2) P(x''_1|y) P(x'_1, x'_2|y) \\
&\quad + \sum_y \left[ \frac{n-1}{n^3} \frac{1}{P(y)} - \frac{2(n-1)}{n^2} \right] \sum_{x'_1} \sum_{x'_2, x''_2} \mathbf{f}^T(x'_1, x'_2) \Lambda_{\mathbf{f}}^{-1} \mathbf{f}(x'_1, x''_2) P(x''_2|y) P(x'_1, x'_2|y) \\
&\quad + \sum_y \left[ \frac{n-1}{n^3} \frac{1}{P(y)} - \frac{2(n-1)}{n^2} + \frac{n-1}{n} P(y) \right] \\
&\quad \cdot \sum_{x'_1, x'_2} \sum_{x''_1, x''_2} \mathbf{f}^T(x'_1, x'_2) \Lambda_{\mathbf{f}}^{-1} \mathbf{f}(x''_1, x''_2) P(x'_1, x'_2|y) P(x''_1, x''_2|y) \\
&\quad + \frac{n-1}{n^3} \sum_y \frac{1}{P(y)} \sum_{x'_1, x'_2} \sum_{x''_1, x''_2} \mathbf{f}^T(x'_1, x'_2) \Lambda_{\mathbf{f}}^{-1} \mathbf{f}(x''_1, x''_2) P(x'_1, x''_2|y) P(x''_1, x'_2|y) \\
&\quad + \frac{n-1}{n^3} \sum_y \frac{1}{P(y)} \sum_{x'_1, x'_2} \mathbf{f}^T(x'_1, x'_2) \Lambda_{\mathbf{f}}^{-1} \mathbf{f}(x'_1, x'_2) P(x'_1|y) P(x'_2|y) \\
&\quad + \sum_y \left[ \frac{1}{n^3} \frac{1}{P^2(y)} - \frac{2}{n^2 P(y)} + 1 \right] \sum_{x'_1, x'_2} \mathbf{f}^T(x'_1, x'_2) \Lambda_{\mathbf{f}}^{-1} \mathbf{f}(x'_1, x'_2) P(x'_1, x'_2|y) \tag{42}
\end{aligned}$$

79 where we obtain (42) from (29).

80 The cases of  $k \geq 3$  can be given likewise.

## 81 D Details of Experiments

### 82 D.1 Training Loss

83 In this section, we demonstrate the approach to computing the training loss from sample features.

84 To compute the training loss  $\tilde{\mathcal{L}}_{\text{train}}(\mathbf{f}, \mathbf{g})$ , we first introduce the following lemma, which links the  $\chi^2$   
85 divergence to H-Score which can then be expressed through the loss that we have given.

86 **Lemma 5.** *Let  $(\mathbf{f}^*, \mathbf{g}^*)$  be the features that minimize the  $\chi^2$ -divergence loss*  
87  $\chi_R^2(\hat{P}_{X_1 X_2 Y}, \hat{P}_{X_1 X_2} \tilde{P}_{Y|X_1 X_2}^{(\mathbf{f}, \mathbf{g})})$ , *where  $\tilde{P}_{Y|X_1 X_2}^{(\mathbf{f}, \mathbf{g})}(x_1, x_2, y) \triangleq \hat{P}_Y(y)(1 + \mathbf{f}^T(x_1, x_2)\mathbf{g}(y))$ ,*  
88 *for all  $(x_1, x_2, y)$ , and the reference distribution is  $\hat{P}_{X_1 X_2} \hat{P}_Y$ . Then, we have*

$$\mathbb{E}_{\hat{P}_{X_1 X_2}}[\mathbf{f}^*(X_1, X_2)] = \mathbb{E}_{\hat{P}_Y}[\mathbf{g}^*(Y)] = \mathbf{0}, \quad (43)$$

89 and  $(\mathbf{f}^*, \mathbf{g}^*)$  are also the optimal features that maximize the H-score of target samples:

$$H(\mathbf{f}, \mathbf{g}) \triangleq \mathbb{E}_{\hat{P}_{X_1 X_2}}[\tilde{\mathbf{f}}^T(X_1, X_2)\tilde{\mathbf{g}}(Y)] - \frac{1}{2} \text{tr}(\hat{\mathbf{\Lambda}}_{\mathbf{f}}\hat{\mathbf{\Lambda}}_{\mathbf{g}}), \quad (44)$$

90 where  $\tilde{\mathbf{f}}(X_1, X_2) \triangleq \mathbf{f}(X) - \mathbb{E}_{\hat{P}_{X_1 X_2}}[\mathbf{f}(X_1 X_2)]$ ,  $\tilde{\mathbf{g}}(Y) \triangleq \mathbf{g}(Y) - \mathbb{E}_{\hat{P}_Y}[\mathbf{g}(Y)]$ ,  $\hat{\mathbf{\Lambda}}_{\mathbf{f}}$  and  $\hat{\mathbf{\Lambda}}_{\mathbf{g}}$  are the  
91 covariance matrices of features on the training samples, defined as:

$$\hat{\mathbf{\Lambda}}_{\mathbf{f}} \triangleq \mathbb{E}_{\hat{P}_{X_1 X_2}}[\tilde{\mathbf{f}}(X_1, X_2)\tilde{\mathbf{f}}^T(X_1, X_2)], \quad (45)$$

92

$$\hat{\mathbf{\Lambda}}_{\mathbf{g}} \triangleq \mathbb{E}_{\hat{P}_Y}[\tilde{\mathbf{g}}(Y)\tilde{\mathbf{g}}^T(Y)]. \quad (46)$$

93 We can derive the H-score for Markov structure  $H^{(M)}(\mathbf{f}, \mathbf{g})$  similarly. Then, the training loss can be  
94 implemented by

$$(\mathbf{f}^*, \mathbf{g}^*) \leftarrow \arg \max_{\mathbf{f}, \mathbf{g}} (1 - \alpha)H(\mathbf{f}, \mathbf{g}) + \alpha H^{(M)}(\mathbf{f}, \mathbf{g}). \quad (47)$$

95 Unfold the loss functions in (47), we have our training loss function,

$$\begin{aligned} \tilde{\mathcal{L}}_{\text{train}}^{(\alpha)}(\mathbf{f}, \mathbf{g}) &= (1 - \alpha)\mathcal{L}_{\text{dep}}(\mathbf{f}, \mathbf{g}) + \alpha\mathcal{L}_{\text{dep}}^{(M)}(\mathbf{f}, \mathbf{g}), \\ \mathcal{L}_{\text{dep}}(\mathbf{f}, \mathbf{g}) &\triangleq \frac{1}{n-1} \sum_{i=1}^n \mathbf{f}^T(x_1^{(i)}, \dots, x_k^{(i)})\mathbf{g}(y^{(i)}) - \frac{1}{2} \text{tr}(\text{cov}(\mathbf{f}) \text{cov}(\mathbf{g})), \\ \mathcal{L}_{\text{dep}}^{(M)}(\mathbf{f}, \mathbf{g}) &\triangleq \sum_{j=1}^m \hat{P}_Y(j) \left[ \frac{1}{n_j-1} \sum_{i=1}^{n_j} \mathbf{f}^T(\underline{x}_1^{(i,j)}, \dots, \underline{x}_k^{(i,j)})\mathbf{g}(j) - \frac{1}{2} \text{tr}(\text{cov}(\mathbf{f}_j) \text{cov}(\mathbf{g})) \right]. \end{aligned}$$

96 As for loss  $\mathcal{L}_{\text{dep}}(\mathbf{f}, \mathbf{g})$ , the calculation is straightforward. With  $n$  training samples  
97  $(x_1^{(i)}, \dots, x_k^{(i)}, y^{(i)})$ ,  $i = 1, \dots, n$ , and two branches of parameterized neural networks with out-  
98 put units:  $\mathbf{f}$  and  $\mathbf{g}$ , we can compute the loss in the following

$$\begin{aligned} \mathbf{f}(x_1^{(i)}, \dots, x_k^{(i)}) &\leftarrow \mathbf{f}(x_1^{(i)}, \dots, x_k^{(i)}) - \frac{1}{n} \sum_{t=1}^n \mathbf{f}(x_1^{(t)}, \dots, x_k^{(t)}), i = 1, \dots, n \\ \mathbf{g}(y^{(i)}) &\leftarrow \mathbf{g}(y^{(i)}) - \frac{1}{n} \sum_{t=1}^n \mathbf{g}(y^{(t)}), i = 1, \dots, n \\ \text{cov}(\mathbf{f}) &\leftarrow \frac{1}{n-1} \sum_{t=1}^n \mathbf{f}(x_1^{(t)}, \dots, x_k^{(t)})\mathbf{f}^T(x_1^{(t)}, \dots, x_k^{(t)}) \\ \text{cov}(\mathbf{g}) &\leftarrow \frac{1}{n-1} \sum_{t=1}^n \mathbf{g}(y^{(t)})\mathbf{g}^T(y^{(t)}). \end{aligned}$$

Table 1: The optimal coefficients  $\alpha^*$  derived by auto-CODES and grid search method on different training sample sizes on the IEMOCAP dataset.

| Sample size n<br>(dialogue size) | grid search (gs) |                    | auto-CODES (auto)   |                    |                         |
|----------------------------------|------------------|--------------------|---------------------|--------------------|-------------------------|
|                                  | $\alpha_{gs}$    | accuracy           | $\alpha_{auto}$     | accuracy           | $n \cdot \alpha_{auto}$ |
| 446 (10)                         | 0.01             | 42.784 $\pm$ 1.465 | 0.0151 $\pm$ 0.0010 | 43.023 $\pm$ 1.706 | 6.73                    |
| 565 (12)                         | 0.01             | 44.754 $\pm$ 1.220 | 0.0129 $\pm$ 0.0009 | 45.478 $\pm$ 1.236 | 7.29                    |
| 647 (14)                         | 0.01             | 45.730 $\pm$ 1.420 | 0.0111 $\pm$ 0.0005 | 46.239 $\pm$ 1.128 | 7.18                    |

As for loss  $\mathcal{L}_{dep}^{(M)}(\mathbf{f}, \mathbf{g})$ , it needs a permutation on samples' modalities within the subset of the same label. We denote the subset of training samples with label  $j \in \{1, \dots, k\}$  as  $\mathcal{D}_j = \{(x_1^{(i,j)}, \dots, x_k^{(i,j)})\}_{i=1}^{d_j}$ , where  $d_j$  is the number of samples whose label is  $j$  in the overall dataset  $\mathcal{D}$ .  $x_t^{(i,j)}$  is chosen from  $\{x_t^{(i,j)}\}_{i=1}^{d_j}$ ,  $t = 1, \dots, k$ , and  $n_j = \prod_{t=1}^k d_t$ .  $\text{cov}(\mathbf{f}_j) \leftarrow \frac{1}{n_j - 1} \sum_{t=1}^{n_j} \mathbf{f}(x_1^{(t,j)}, \dots, x_k^{(t,j)}) \mathbf{f}^T(x_1^{(t,j)}, \dots, x_k^{(t,j)})$ .

## D.2 Optimal Coefficient in Testing Loss

There are 18 terms in the expression of the optimal  $\alpha^*$ . Here we illustrate an example that they can be computed by the mean of features, and the other terms can be computed similarly.

As for term  $\sum_y \sum_{x'_1, x'_2} \sum_{x''_1, x''_2} \mathbf{f}^T(x'_1, x'_2) \Lambda_{\mathbf{f}}^{-1} \mathbf{f}(x''_1, x''_2) P(x'_1, x'_2 | y) P(x''_1, x''_2 | y) \left( \frac{1}{n^2} - \frac{1}{n} P(y) \right)$ , it can be computed by three parts.

First, we compute the covariance matrix  $\Lambda_{\mathbf{f}}$  using features of data, i.e.,

$$\frac{1}{n} \sum_{i=1}^n \mathbf{f}(x_1^{(i)}, x_2^{(i)}) \mathbf{f}^T(x_1^{(i)}, x_2^{(i)}).$$

Then, we computed  $\sum_{x'_1, x'_2} P(x'_1, x'_2 | y) \mathbf{f}(x'_1, x'_2)$  by  $\frac{\sum_{i=1}^n \mathbf{f}(x_1^{(i)}, x_2^{(i)}) \mathbb{1}\{y^{(i)} = y\}}{\sum_{i=1}^n \mathbb{1}\{y^{(i)} = y\}}$ .

At last, we sum them up over  $y \in \mathcal{Y}$ .

In summary,

$$\begin{aligned} & \sum_y \left( \frac{1}{n^2} - \frac{P(y)}{n} \right) \sum_{x'_1, x'_2} \sum_{x''_1, x''_2} \mathbf{f}^T(x'_1, x'_2) \Lambda_{\mathbf{f}}^{-1} \mathbf{f}(x''_1, x''_2) P(x'_1, x'_2 | y) P(x''_1, x''_2 | y) \\ &= \sum_y \left( \frac{1}{n^2} - \frac{P(y)}{n} \right) \frac{\sum_{i=1}^n \mathbf{f}(x_1^{(i)}, x_2^{(i)}) \mathbb{1}\{y^{(i)} = y\}}{\sum_{i=1}^n \mathbb{1}\{y^{(i)} = y\}} \cdot \frac{1}{n} \sum_{j=1}^n \mathbf{f}(x_1^{(j)}, x_2^{(j)}) \mathbf{f}^T(x_1^{(j)}, x_2^{(j)}) \\ & \quad \cdot \frac{\sum_{\ell=1}^n \mathbf{f}(x_1^{(\ell)}, x_2^{(\ell)}) \mathbb{1}\{y^{(\ell)} = y\}}{\sum_{\ell=1}^n \mathbb{1}\{y^{(\ell)} = y\}}. \end{aligned}$$

## D.3 Results on IEMOCAP

The further results on IEMOCAP are shown in Table 1.
